# Supplementary material for: Development and Internal Validation of a Clinical Cox Model for Predicting Overall Survival in Patients with Lung Cancer: Real-World Evidence from Seven Hospitals in China
Source: Research Square preprint supplement (doi:10.21203/rs.3.rs-7743556/v1), 2025-09-30
Supplement: Supplementary file 1 [file 8014a851a7a2928120d2b256.docx]

**Development and Internal Validation of a Clinical Cox Model for Overall Survival in Lung Cancer: Real-World Evidence From Seven Hospitals in China**

**Supplementary Materials 1**

eFigure1.Study flow diagram (screening, exclusions, training/validation split).


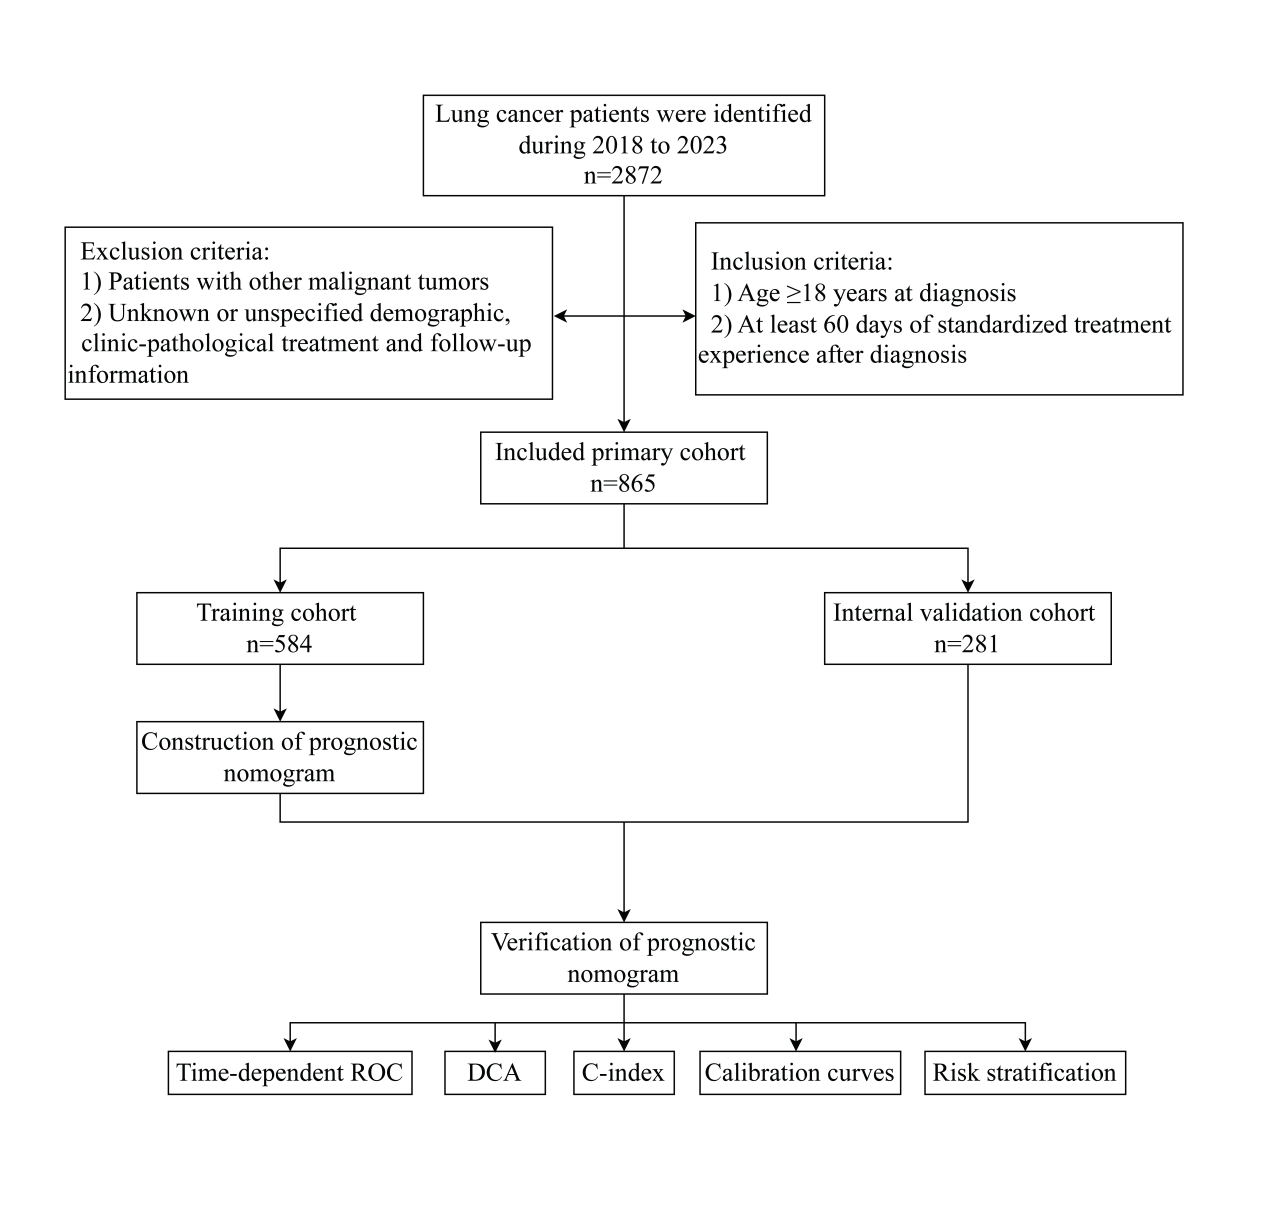


eFigure2.Features with a missing percentage <40% were retained.Data missing rate display.


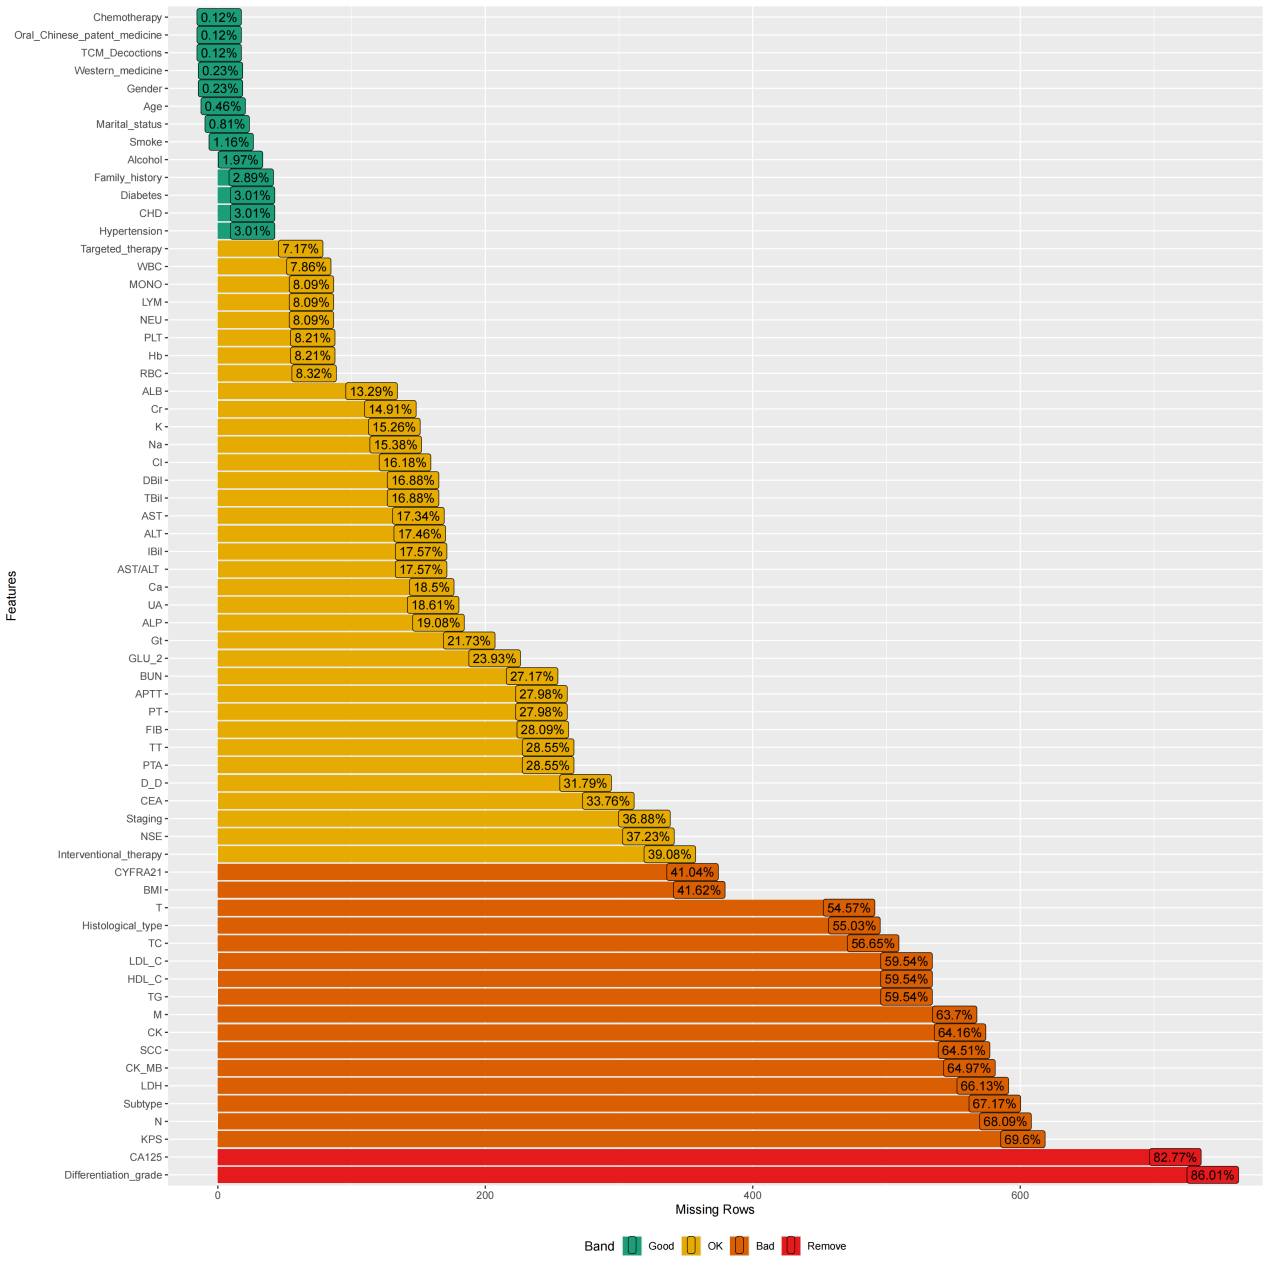


eTbale1.Baseline of death or not in the entire dataset.

| Variables | Total (n = 865) | Alive  (n = 353) | Death  (n = 512) | Statistic | *P* |
| --- | --- | --- | --- | --- | --- |
|
| OS time, M (Q₁, Q₃) | 9.00 (4.00, 19.00) | 12.00 (7.00, 21.00) | 7.00 (2.00, 15.00) | Z=-7.29 | **<.001** |
| CEA, M (Q₁, Q₃) | 69.26 (5.76, 1000.00) | 25.28 (4.00, 687.50) | 265.05 (8.63, 1000.00) | Z=-6.03 | **<.001** |
| NSE, M (Q₁, Q₃) | 21.85 (17.98, 26.87) | 21.85 (15.75, 26.73) | 21.85 (21.85, 26.88) | Z=-3.15 | **0.002** |
| WBC, M (Q₁, Q₃) | 8.72 (6.50, 11.92) | 7.38 (5.79, 9.52) | 9.48 (7.48, 13.65) | Z=-8.59 | **<.001** |
| NEU, M (Q₁, Q₃) | 79.23 (71.20, 85.40) | 73.66 (64.88, 80.70) | 81.30 (76.31, 87.50) | Z=-10.27 | **<.001** |
| LYM, M (Q₁, Q₃) | 11.30 (7.00, 18.00) | 16.02 (10.10, 22.44) | 9.50 (5.40, 13.50) | Z=-10.72 | **<.001** |
| MONO, M (Q₁, Q₃) | 6.84 (4.87, 9.00) | 7.23 (5.57, 9.52) | 6.80 (4.40, 8.50) | Z=-4.43 | **<.001** |
| RBC, M (Q₁, Q₃) | 3.80 (3.30, 4.25) | 4.00 (3.59, 4.40) | 3.65 (3.02, 4.07) | Z=-7.88 | **<.001** |
| Hb, M (Q₁, Q₃) | 113.00 (96.60, 127.00) | 119.60 (107.30, 133.10) | 110.00 (88.00, 120.25) | Z=-8.67 | **<.001** |
| PLT, M (Q₁, Q₃) | 231.25 (162.00, 297.00) | 240.00 (184.00, 311.00) | 231.25 (151.75, 291.00) | Z=-2.83 | **0.005** |
| ALT, M (Q₁, Q₃) | 19.50 (13.00, 26.40) | 19.50 (13.00, 26.30) | 19.50 (12.65, 26.90) | Z=-0.46 | 0.645 |
| AST, M (Q₁, Q₃) | 22.80 (18.40, 31.10) | 22.70 (17.70, 28.00) | 22.80 (19.00, 35.92) | Z=-2.96 | **0.003** |
| AST ALT, M (Q₁, Q₃) | 1.27 (1.02, 1.69) | 1.23 (0.94, 1.57) | 1.27 (1.10, 1.77) | Z=-4.07 | **<.001** |
| Gt, M (Q₁, Q₃) | 38.10 (26.20, 62.40) | 38.10 (23.60, 53.00) | 38.10 (31.00, 70.47) | Z=-3.74 | **<.001** |
| ALP, M (Q₁, Q₃) | 95.00 (78.00, 124.30) | 91.10 (72.20, 106.90) | 95.00 (87.25, 139.27) | Z=-6.13 | **<.001** |
| TBil, M (Q₁, Q₃) | 11.50 (8.90, 15.07) | 10.50 (8.10, 13.10) | 11.50 (10.32, 16.42) | Z=-6.76 | **<.001** |
| DBil, M (Q₁, Q₃) | 4.40 (3.50, 5.70) | 4.40 (3.50, 5.50) | 4.40 (3.50, 5.79) | Z=-0.99 | 0.323 |
| IBil, M (Q₁, Q₃) | 6.90 (4.90, 9.60) | 6.00 (4.00, 7.70) | 6.90 (6.47, 10.75) | Z=-7.59 | **<.001** |
| ALB, M (Q₁, Q₃) | 33.31 (29.80, 37.60) | 36.40 (33.00, 40.10) | 32.65 (28.50, 34.23) | Z=-10.81 | **<.001** |
| UA, M (Q₁, Q₃) | 270.50 (213.50, 337.10) | 270.50 (217.00, 337.10) | 270.50 (210.00, 336.27) | Z=-0.58 | 0.559 |
| BUN, M (Q₁, Q₃) | 5.13 (4.20, 6.15) | 5.00 (3.90, 5.40) | 5.13 (5.08, 6.86) | Z=-6.64 | **<.001** |
| Cr, M (Q₁, Q₃) | 59.00 (47.80, 71.00) | 59.00 (50.20, 70.10) | 59.00 (45.90, 72.60) | Z=-0.82 | 0.415 |
| K, M (Q₁, Q₃) | 4.01 (3.70, 4.30) | 4.01 (3.80, 4.30) | 4.01 (3.62, 4.33) | Z=-1.33 | 0.184 |
| Na, M (Q₁, Q₃) | 137.00 (134.40, 139.90) | 137.00 (135.10, 140.00) | 137.00 (133.88, 139.30) | Z=-3.15 | **0.002** |
| Cl, M (Q₁, Q₃) | 100.00 (97.00, 103.00) | 101.00 (99.00, 104.00) | 100.00 (95.40, 101.80) | Z=-7.44 | **<.001** |
| Ca, M (Q₁, Q₃) | 2.18 (2.10, 2.28) | 2.22 (2.15, 2.33) | 2.18 (2.05, 2.21) | Z=-7.74 | **<.001** |
| GLU 2, M (Q₁, Q₃) | 5.52 (5.11, 6.23) | 5.52 (4.99, 6.05) | 5.52 (5.30, 6.33) | Z=-3.49 | **<.001** |
| PT, M (Q₁, Q₃) | 12.40 (11.70, 13.00) | 12.20 (10.90, 12.40) | 12.40 (12.40, 13.60) | Z=-11.01 | **<.001** |
| PTA, M (Q₁, Q₃) | 85.00 (78.10, 92.10) | 87.00 (85.00, 102.00) | 85.00 (72.60, 85.00) | Z=-10.94 | **<.001** |
| APTT, M (Q₁, Q₃) | 30.50 (28.90, 32.90) | 30.50 (28.70, 32.10) | 30.50 (29.08, 33.60) | Z=-1.13 | 0.258 |
| FIB, M (Q₁, Q₃) | 4.18 (3.63, 4.67) | 4.18 (3.62, 4.47) | 4.18 (3.66, 4.72) | Z=-1.00 | 0.315 |
| TT, M (Q₁, Q₃) | 15.40 (14.20, 16.60) | 14.30 (12.80, 15.40) | 15.70 (15.40, 17.40) | Z=-15.17 | **<.001** |
| D D, M (Q₁, Q₃) | 1.45 (0.85, 2.10) | 1.10 (0.32, 1.45) | 1.45 (1.45, 3.91) | Z=-13.64 | **<.001** |
| Age, M (Q₁, Q₃) | 70.00 (63.00, 79.00) | 66.00 (60.00, 73.00) | 73.00 (66.00, 83.00) | Z=-9.60 | **<.001** |
| Marital status, n(%) |  |  |  | - | **0.016** |
| 0 | 3 (0.35) | 0 (0.00) | 3 (0.59) |  |  |
| 1 | 844 (97.57) | 351 (99.43) | 493 (96.29) |  |  |
| 2 | 3 (0.35) | 0 (0.00) | 3 (0.59) |  |  |
| 4 | 15 (1.73) | 2 (0.57) | 13 (2.54) |  |  |
| Staging, n(%) |  |  |  | - | 0.133 |
| 0 | 5 (0.58) | 0 (0.00) | 5 (0.98) |  |  |
| 1 | 66 (7.63) | 24 (6.80) | 42 (8.20) |  |  |
| 2 | 794 (91.79) | 329 (93.20) | 465 (90.82) |  |  |
| Gender, n(%) |  |  |  | χ²=0.01 | 0.919 |
| 0 | 285 (32.95) | 117 (33.14) | 168 (32.81) |  |  |
| 1 | 580 (67.05) | 236 (66.86) | 344 (67.19) |  |  |
| Smoke, n(%) |  |  |  | χ²=5.87 | **0.015** |
| 0 | 391 (45.20) | 177 (50.14) | 214 (41.80) |  |  |
| 1 | 474 (54.80) | 176 (49.86) | 298 (58.20) |  |  |
| Alcohol, n(%) |  |  |  | χ²=0.28 | 0.598 |
| 0 | 570 (65.90) | 229 (64.87) | 341 (66.60) |  |  |
| 1 | 295 (34.10) | 124 (35.13) | 171 (33.40) |  |  |
| Family history, n(%) |  |  |  | χ²=0.53 | 0.466 |
| 0 | 703 (81.27) | 291 (82.44) | 412 (80.47) |  |  |
| 1 | 162 (18.73) | 62 (17.56) | 100 (19.53) |  |  |
| CCP, n(%) |  |  |  | χ²=3.49 | 0.062 |
| 0 | 839 (96.99) | 347 (98.30) | 492 (96.09) |  |  |
| 1 | 26 (3.01) | 6 (1.70) | 20 (3.91) |  |  |
| Hypertension, n(%) |  |  |  | χ²=0.01 | 0.915 |
| 0 | 629 (72.72) | 256 (72.52) | 373 (72.85) |  |  |
| 1 | 236 (27.28) | 97 (27.48) | 139 (27.15) |  |  |
| CHD, n(%) |  |  |  | χ²=1.90 | 0.168 |
| 0 | 831 (96.07) | 343 (97.17) | 488 (95.31) |  |  |
| 1 | 34 (3.93) | 10 (2.83) | 24 (4.69) |  |  |
| Diabetes, n(%) |  |  |  | χ²=1.28 | 0.259 |
| 0 | 822 (95.03) | 339 (96.03) | 483 (94.34) |  |  |
| 1 | 43 (4.97) | 14 (3.97) | 29 (5.66) |  |  |
| Lung, n(%) |  |  |  | χ²=4.27 | **0.039** |
| 0 | 503 (58.15) | 220 (62.32) | 283 (55.27) |  |  |
| 1 | 362 (41.85) | 133 (37.68) | 229 (44.73) |  |  |
| Bone, n(%) |  |  |  | χ²=5.26 | **0.022** |
| 0 | 494 (57.11) | 218 (61.76) | 276 (53.91) |  |  |
| 1 | 371 (42.89) | 135 (38.24) | 236 (46.09) |  |  |
| DLNM, n(%) |  |  |  | χ²=0.32 | 0.569 |
| 0 | 431 (49.83) | 180 (50.99) | 251 (49.02) |  |  |
| 1 | 434 (50.17) | 173 (49.01) | 261 (50.98) |  |  |
| Adrenal glands, n(%) |  |  |  | χ²=0.73 | 0.391 |
| 0 | 780 (90.17) | 322 (91.22) | 458 (89.45) |  |  |
| 1 | 85 (9.83) | 31 (8.78) | 54 (10.55) |  |  |
| Brain, n(%) |  |  |  | χ²=6.85 | **0.009** |
| 0 | 664 (76.76) | 255 (72.24) | 409 (79.88) |  |  |
| 1 | 201 (23.24) | 98 (27.76) | 103 (20.12) |  |  |
| Liver, n(%) |  |  |  | χ²=2.33 | 0.127 |
| 0 | 694 (80.23) | 292 (82.72) | 402 (78.52) |  |  |
| 1 | 171 (19.77) | 61 (17.28) | 110 (21.48) |  |  |
| TCM Decoctions, n(%) |  |  |  | χ²=45.52 | **<.001** |
| 0 | 584 (67.51) | 284 (80.45) | 300 (58.59) |  |  |
| 1 | 281 (32.49) | 69 (19.55) | 212 (41.41) |  |  |
| Oral Chinese patent medicine, n(%) |  |  |  | χ²=6.83 | **0.009** |
| 0 | 734 (84.86) | 286 (81.02) | 448 (87.50) |  |  |
| 1 | 131 (15.14) | 67 (18.98) | 64 (12.50) |  |  |
| Western medicine, n(%) |  |  |  | χ²=15.80 | **<.001** |
| 0 | 496 (57.34) | 174 (49.29) | 322 (62.89) |  |  |
| 1 | 369 (42.66) | 179 (50.71) | 190 (37.11) |  |  |
| Targeted therapy, n(%) |  |  |  | χ²=32.59 | **<.001** |
| 0 | 811 (93.76) | 311 (88.10) | 500 (97.66) |  |  |
| 1 | 54 (6.24) | 42 (11.90) | 12 (2.34) |  |  |
| Interventional therapy, n(%) |  |  |  | χ²=0.00 | 0.995 |
| 0 | 854 (98.73) | 348 (98.58) | 506 (98.83) |  |  |
| 1 | 11 (1.27) | 5 (1.42) | 6 (1.17) |  |  |
| Chemotherapy, n(%) |  |  |  | χ²=148.66 | **<.001** |
| 0 | 708 (81.85) | 221 (62.61) | 487 (95.12) |  |  |
| 1 | 157 (18.15) | 132 (37.39) | 25 (4.88) |  |  |
| TCM pattern, n(%) |  |  |  | - | **<.001*** |
| 0 | 423 (48.90) | 294 (83.29) | 129 (25.20) |  |  |
| 1 | 136 (15.72) | 7 (1.98) | 129 (25.20) |  |  |
| 2 | 3 (0.35) | 0 (0.00) | 3 (0.59) |  |  |
| 3 | 186 (21.50) | 19 (5.38) | 167 (32.62) |  |  |
| 4 | 1 (0.12) | 0 (0.00) | 1 (0.20) |  |  |
| 5 | 75 (8.67) | 25 (7.08) | 50 (9.77) |  |  |
| 8 | 37 (4.28) | 6 (1.70) | 31 (6.05) |  |  |
| 9 | 1 (0.12) | 0 (0.00) | 1 (0.20) |  |  |
| 10 | 1 (0.12) | 0 (0.00) | 1 (0.20) |  |  |
| 11 | 1 (0.12) | 1 (0.28) | 0 (0.00) |  |  |
| 12 | 1 (0.12) | 1 (0.28) | 0 (0.00) |  |  |

eFigure 3.DCA for the Nomogram and Seven Predictors (6, 12, and 18 Months).

Panels: A and B, 6-month outcome (training and validation); C and D, 12-month outcome; E and F, 18-month outcome. The x-axis shows threshold probability and the y-axis shows net benefit. Curves above both default strategies (“Treat All” and “Treat None”) indicate clinical usefulness. Across clinically plausible thresholds (approximately 0.10–0.60), the nomogram provided the highest and most consistent net benefit in both cohorts at all horizons, whereas single predictors (smoking, WBC, LYM, PTA, D-dimer, chemotherapy, age) yielded limited gains mainly at low thresholds. At very high thresholds (>0.8–0.9), all curves approached zero net benefit.

Abbreviations: WBC, white blood cell count; LYM, lymphocyte count; PTA, prothrombin time activity.

Across all prespecified horizons (6, 12, and 18 months), the nomogram consistently yielded the greatest net benefit across clinically plausible thresholds (approximately 0.10–0.60) in both the training (panels A, C, and E) and validation cohorts (panels B, D, and F). Single predictors (smoking, WBC, LYM, PTA, D-dimer, chemotherapy, and age) offered small gains only at low thresholds and were otherwise inferior to the nomogram. At very high thresholds (>0.8–0.9), all strategies converged toward no net benefit, favoring a “treat none” policy. These patterns were similar between training and validation cohorts, supporting the transportability of the nomogram’s clinical utility.
